# Supplementary material for: AIE phenomena of a cyanostilbene derivative as a probe of molecular assembly processes
Source: Royal Society of Chemistry journal article supplement (doi:10.1039/c6fd00162a), 2016-11-30
Supplement: c6fd00162a1.pdf [file c6fd00162a1.pdf]

Electronic Supplementary Information:

**AIE phenomena of a cyanostilbene derivative as a probe of molecular assembly process**

Fuyuki Ito,<sup>a\*</sup> Jun-ichi Fujimori,<sup>a</sup> Narumi Oka,<sup>a</sup> Michel Sliwa,<sup>b</sup> Cyril Ruckebusch,<sup>b</sup> Syoji Ito<sup>c</sup> and Hiroshi Miyasaka<sup>c</sup>

<sup>a</sup>Institute of Education, Shinshu University, Nagano 380-8544, Japan.

<sup>b</sup>LASIR, UMR 8516, CNRS, Universite des Sciences et Technologies de Lille, 59 655 Villeneuve d'Ascq Cedex, France.

<sup>c</sup>Division of Frontier Materials Science, Graduate School of Engineering Science, Osaka University, Osaka 560-8531, Japan.

**Table S1** Fluorescence lifetime of CN-MBE excited at 355 nm in acetone/water mixture solutions.

| V <sub>w</sub> / % | Monitored wavelength |                |                |                |                |                |
|--------------------|----------------------|----------------|----------------|----------------|----------------|----------------|
|                    | 430 nm               |                |                | 470 nm         |                |                |
|                    | $\tau_1 (A_1)$       | $\tau_2 (A_2)$ | $\tau_3 (A_3)$ | $\tau_1 (A_1)$ | $\tau_2 (A_2)$ | $\tau_3 (A_3)$ |
| 30                 | 0.01 (0.99)          | 4.29 (0.00)    | -              | 0.01 (0.99)    | -              | 4.21 (0.00)    |
| 35                 | 0.01 (0.99)          | 4.91 (0.00)    | 2.52 (0.01)    | 0.01 (0.99)    | -              | 2.85 (0.00)    |
| 40                 | 0.01 (0.98)          | 4.47 (0.01)    | 1.51 (0.02)    | 0.01 (0.96)    | 3.92 (0.03)    | 1.53 (0.01)    |
| 45                 | 0.01 (0.90)          | 3.97 (0.06)    | 1.12 (0.04)    | 0.02 (0.43)    | 2.35 (0.42)    | 1.24 (0.15)    |
| 50                 | 0.02 (0.71)          | 3.39 (0.22)    | 0.77 (0.07)    | 0.13 (0.09)    | 1.96 (0.72)    | 0.90 (0.19)    |
| 60                 | 0.06 (0.20)          | 0.73 (0.12)    | 1.77 (0.67)    | 0.15 (0.10)    | 1.03 (0.22)    | 2.40 (0.68)    |
| 70                 | 0.48 (0.22)          | 1.76 (0.19)    | 4.45 (0.59)    | 0.93 (0.18)    | 2.68 (0.17)    | 5.68 (0.66)    |
| 80                 | 0.54 (0.23)          | 1.82 (0.18)    | 4.60 (0.59)    | 1.00 (0.19)    | 2.74 (0.19)    | 5.77 (0.64)    |
| 90                 | 0.58 (0.25)          | 1.77 (0.22)    | 4.88 (0.53)    | 0.99 (0.20)    | 2.64 (0.30)    | 5.54 (0.50)    |
